# Supplementary material
Source: MDPI journal article supplement (https://www.mdpi.com/2073-4395/12/10/2321)
Supplement: s1 [file s1]

# Soil Biochar Application: Assessment of the Effects on Soil Water Properties, Plant Physiological Status, and Yield of Super-Intensive Olive Groves under Controlled Irrigation Conditions

José María De la Rosa <sup>1,\*</sup>, Paloma Campos <sup>2</sup> and Antonio Diaz-Espejo <sup>1</sup>

<sup>1</sup> Instituto de Recursos Naturales y Agrobiología de Sevilla (IRNAS-CSIC), Reina Mercedes Av., 10, 41012, Seville, Spain;

<sup>2</sup> Departamento de Cristalografía, Mineralogía y Química Agrícola, Universidad de Sevilla, Profesor García González, 1. 41012 Seville, Spain

\* Correspondence e-mail: [jmrosa@irnase.csic.es](mailto:jmrosa@irnase.csic.es)

## Supplementary material

**Figure S1.** Representation of linear correlation between soil resistance to penetration and soil moisture (0-5 cm depth).

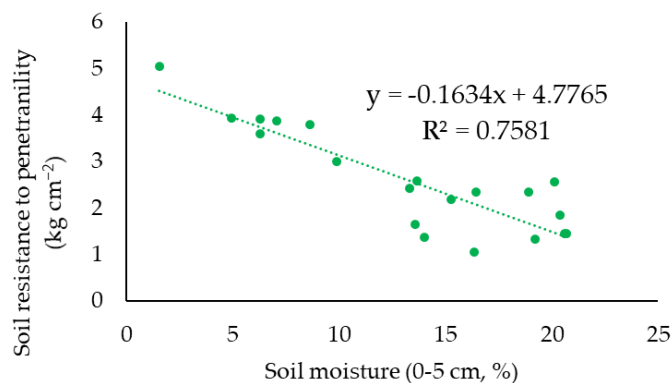

**Figure S2.** Linear correlations between the maximum electron transport rate ( $\text{ETR}_{\text{max}}$ ) and net photosynthetic rate ( $A_N$ ). (A) All treatments; (B) Correlations per treatment: Control, Olive Biochar+Green compost, Green compost, and Olive Biochar.

(A) All treatments

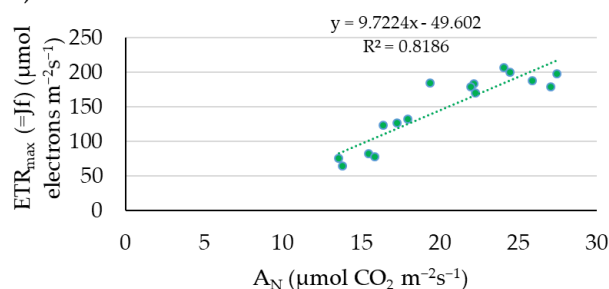

(B) Per treatment

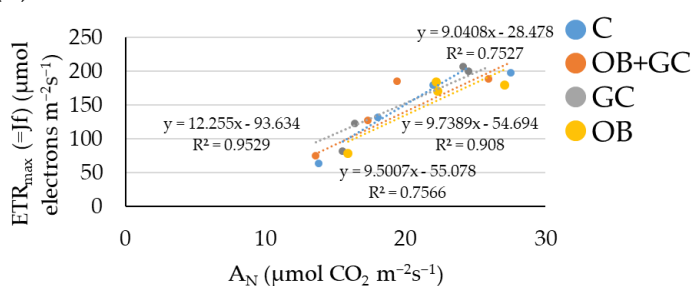

**Table S1.** Soil moisture and resistance to penetrability (in situ parameters) of not amended and amended soils.

|                                                    | Sample depth | Day of year | Month     | Treatments             |                        |                        |                        |
|----------------------------------------------------|--------------|-------------|-----------|------------------------|------------------------|------------------------|------------------------|
|                                                    |              |             |           | C                      | OB+GC                  | GC                     | OB                     |
| Soil moisture (%)                                  | 0-5 cm       | 104         | April     | 7.1±4.6 <sup>c</sup>   | 14.0±2.5 <sup>b</sup>  | 13.6±3.1 <sup>b</sup>  | 16.3±0.2 <sup>a</sup>  |
|                                                    |              | 118         | April     | 13.3±3.6 <sup>bc</sup> | 16.4±0.2 <sup>a</sup>  | 13.7±2.4 <sup>c</sup>  | 15.3±2.4 <sup>ab</sup> |
|                                                    |              | 140         | May       | 6.3±8.3 <sup>a</sup>   | 5.0±4.4 <sup>a</sup>   | 6.3±8.4 <sup>a</sup>   | 9.9±7.7 <sup>a</sup>   |
|                                                    |              | 159         | June      | 1.6±0.6 <sup>c</sup>   | 18.9±2.3 <sup>b</sup>  | 20.1±0.3 <sup>b</sup>  | 20.4±0.2 <sup>a</sup>  |
|                                                    |              | 187         | July      | 8.7±6.4 <sup>b</sup>   | 20.6±0.1 <sup>a</sup>  | 20.7±0.1 <sup>a</sup>  | 19.2±2.7 <sup>a</sup>  |
|                                                    |              | 251         | September | 7.3±7.4 <sup>c</sup>   | 20.4±0.3 <sup>b</sup>  | 20.5±0.2 <sup>b</sup>  | 20.7±0.1 <sup>a</sup>  |
|                                                    |              | 260         | September | 18.9±3.1 <sup>b</sup>  | 20.1±0.3 <sup>b</sup>  | 18.6±2.8 <sup>b</sup>  | 20.4±0.3 <sup>a</sup>  |
|                                                    |              | 287         | October   | 16.2±7.7 <sup>a</sup>  | 20.3±0.4 <sup>a</sup>  | 20.0±1.1 <sup>a</sup>  | 18.5±3.6 <sup>a</sup>  |
|                                                    |              | 294         | October   | 14.8±4.3 <sup>b</sup>  | 19.2±1.8 <sup>a</sup>  | 15.5±4.3 <sup>b</sup>  | 18.2±2.3 <sup>ab</sup> |
|                                                    |              | 334         | November  | 19.1±2.9 <sup>a</sup>  | 20.3±0.2 <sup>a</sup>  | 20.2±0.3 <sup>a</sup>  | 20.2±0.2 <sup>a</sup>  |
|                                                    |              | 418         | February  | 11.2±7.9 <sup>c</sup>  | 12.2±6.9 <sup>bc</sup> | 17.5±5.3 <sup>ab</sup> | 18.7±2.6 <sup>a</sup>  |
|                                                    | 5-10 cm      | 104         | April     | 13.0±4.6 <sup>b</sup>  | 16.3±0.2 <sup>b</sup>  | 16.5±0.2 <sup>a</sup>  | 16.6±0.1 <sup>a</sup>  |
|                                                    |              | 118         | April     | 16.0±1.6 <sup>a</sup>  | 16.6±0.1 <sup>a</sup>  | 15.1±2.0 <sup>b</sup>  | 16.3±1.2 <sup>a</sup>  |
|                                                    |              | 140         | May       | 12.7±6.1 <sup>b</sup>  | 16.1±3.2 <sup>b</sup>  | 17.2±3.9 <sup>ab</sup> | 18.3±2.7 <sup>a</sup>  |
|                                                    |              | 159         | June      | 4.6±4.9 <sup>c</sup>   | 18.8±5.5 <sup>b</sup>  | 20.5±0.1 <sup>b</sup>  | 20.6±0.1 <sup>a</sup>  |
|                                                    |              | 187         | July      | 13.4±5.9 <sup>c</sup>  | 20.8±0.1 <sup>b</sup>  | 20.8±0.1 <sup>b</sup>  | 20.8±0.1 <sup>a</sup>  |
|                                                    |              | 251         | September | 17.5±3.3 <sup>b</sup>  | 20.7±0.1 <sup>a</sup>  | 20.7±0.1 <sup>a</sup>  | 19.3±5.2 <sup>a</sup>  |
|                                                    |              | 260         | September | 20.5±0.3 <sup>ab</sup> | 20.5±0.1 <sup>b</sup>  | 20.4±0.2 <sup>b</sup>  | 20.6±0.1 <sup>a</sup>  |
|                                                    |              | 287         | October   | 19.1±3.0 <sup>a</sup>  | 20.6±0.1 <sup>a</sup>  | 20.6±0.1 <sup>a</sup>  | 20.6±0.1 <sup>a</sup>  |
|                                                    |              | 294         | October   | 18.8±2.2 <sup>a</sup>  | 20.4±0.3 <sup>a</sup>  | 19.1±2.0 <sup>a</sup>  | 20.3±0.2 <sup>a</sup>  |
|                                                    |              | 334         | November  | 20.5±0.2 <sup>a</sup>  | 20.5±0.1 <sup>a</sup>  | 20.4±0.1 <sup>a</sup>  | 20.5±0.1 <sup>a</sup>  |
|                                                    |              | 418         | February  | 17.3±3.8 <sup>a</sup>  | 16.1±4.0 <sup>a</sup>  | 20.4±0.3 <sup>a</sup>  | 20.4±0.2 <sup>a</sup>  |
| Resistance to Penetrability (kg cm <sup>-2</sup> ) |              | 104         | April     | 3.9±1.7 <sup>a</sup>   | 1.4±1.0 <sup>bc</sup>  | 1.7±1.3 <sup>b</sup>   | 1.1±1.0 <sup>c</sup>   |
|                                                    |              | 118         | April     | 2.4±0.8 <sup>a</sup>   | 2.3±0.6 <sup>a</sup>   | 2.6±0.6 <sup>a</sup>   | 2.2±0.4 <sup>a</sup>   |
|                                                    |              | 140         | May       | 3.9±0.9 <sup>a</sup>   | 3.9±0.9 <sup>a</sup>   | 3.6±1.1 <sup>a</sup>   | 3.0±0.7 <sup>b</sup>   |
|                                                    |              | 159         | June      | 5.1±1.3 <sup>a</sup>   | 2.3±1.8 <sup>b</sup>   | 2.6±1.9 <sup>b</sup>   | 1.9±1.3 <sup>b</sup>   |
|                                                    |              | 173         | June      | 3.9±2.0 <sup>a</sup>   | 2.1±1.0 <sup>b</sup>   | 2.1±1.2 <sup>b</sup>   | 1.4±0.8 <sup>c</sup>   |
|                                                    |              | 187         | July      | 3.8±2.0 <sup>a</sup>   | 1.5±1.0 <sup>b</sup>   | 1.5±0.9 <sup>b</sup>   | 1.3±0.9 <sup>b</sup>   |
|                                                    |              | 251         | September | 4.3±1.8 <sup>a</sup>   | 1.3±0.9 <sup>c</sup>   | 1.7±0.9 <sup>b</sup>   | 1.2±0.7 <sup>c</sup>   |
|                                                    |              | 287         | October   | 3.2±1.8 <sup>a</sup>   | 1.1±0.7 <sup>c</sup>   | 1.5±0.8 <sup>b</sup>   | 1.2±0.7 <sup>c</sup>   |
|                                                    |              | 334         | November  | 3.7±1.6 <sup>a</sup>   | 1.3±0.5 <sup>c</sup>   | 2.1±0.9 <sup>b</sup>   | 1.9±0.8 <sup>bc</sup>  |
|                                                    |              | 418         | February  | 4.7±1.6 <sup>a</sup>   | 2.0±1.0 <sup>c</sup>   | 3.7±1.7 <sup>b</sup>   | 2.6±1.2 <sup>c</sup>   |

Different letters indicate significant differences between treatments in the same sampling ( $p < 0.05$ ).

C: Control; OB+GC: Olive Biochar+ Green compost; GC: Green Compost; OB: Olive Biochar

**Table S2.** Physiological parameters measured in olive trees: Net photosynthesis rate ( $A_N$ ), stomatal conductance ( $g_s$ ), maximum rate of electron transport ( $ETR_{max}$ ) and calculated value of intrinsic water-use efficiency ( $WUE_i$ ) at day of the year 251, 287, 334 and 418.

|                                                                                   |       | Day of year (month)    |                         |                        |                        |                  |
|-----------------------------------------------------------------------------------|-------|------------------------|-------------------------|------------------------|------------------------|------------------|
|                                                                                   |       | 251 (September)        | 287 (October)           | 334 (November)         | 418 (February)         |                  |
| <b>A<sub>N</sub></b> (μmol CO <sub>2</sub> m <sup>-2</sup> s <sup>-1</sup> )      | C     | 27.5±4.0 <sup>a</sup>  | 18.0±3.6 <sup>b</sup>   | 13.8±2.6 <sup>a</sup>  | 22.0±3.8 <sup>ab</sup> |                  |
|                                                                                   | OB+GC | 25.9±4.7 <sup>a</sup>  | 17.3±4.3 <sup>b</sup>   | 13.6±3.6 <sup>a</sup>  | 19.4±3.4 <sup>b</sup>  |                  |
|                                                                                   | GC    | 24.1±2.2 <sup>a</sup>  | 16.4±2.8 <sup>b</sup>   | 15.5±3.0 <sup>a</sup>  | 24.5±2.1 <sup>a</sup>  |                  |
|                                                                                   | OB    | 27.1±5.1 <sup>a</sup>  | 22.2±2.5 <sup>a</sup>   | 15.9±1.8 <sup>a</sup>  | 22.3±4.3 <sup>ab</sup> |                  |
| <b>g<sub>s, max</sub></b> (mol H <sub>2</sub> O m <sup>-2</sup> s <sup>-1</sup> ) | C     | 0.20±0.04 <sup>a</sup> | 0.18±0.07 <sup>a</sup>  | 0.11±0.03 <sup>a</sup> | 0.12±0.03 <sup>a</sup> |                  |
|                                                                                   | OB+GC | 0.21±0.05 <sup>a</sup> | 0.15±0.05 <sup>ab</sup> | 0.11±0.03 <sup>a</sup> | 0.10±0.04 <sup>a</sup> |                  |
|                                                                                   | GC    | 0.20±0.03 <sup>a</sup> | 0.19±0.04 <sup>a</sup>  | 0.12±0.03 <sup>a</sup> | 0.11±0.02 <sup>a</sup> |                  |
|                                                                                   | OB    | 0.20±0.04 <sup>a</sup> | 0.11±0.02 <sup>b</sup>  | 0.12±0.03 <sup>a</sup> | 0.11±0.03 <sup>a</sup> |                  |
| <b>ETR<sub>max</sub></b> (=Jf) (μmol electrons m <sup>-2</sup> s <sup>-1</sup> )  | C     | 198±49 <sup>a</sup>    | 132±50 <sup>b</sup>     | 64±22 <sup>a</sup>     | 179±22 <sup>a</sup>    |                  |
|                                                                                   | OB+GC | 188±60 <sup>a</sup>    | 127±58 <sup>b</sup>     | 75±18 <sup>a</sup>     | 185±32 <sup>a</sup>    |                  |
|                                                                                   | GC    | 207±20 <sup>a</sup>    | 123±47 <sup>b</sup>     | 82±21 <sup>a</sup>     | 200±19 <sup>a</sup>    |                  |
|                                                                                   | OB    | 179±43 <sup>a</sup>    | 184±22 <sup>a</sup>     | 78±11 <sup>a</sup>     | 170±35 <sup>a</sup>    | <b>Average</b>   |
| <b>WUE<sub>i</sub></b>                                                            | C     | 138 <sup>b</sup>       | 100 <sup>a</sup>        | 125 <sup>a</sup>       | 183 <sup>a</sup>       | 137 <sup>a</sup> |
|                                                                                   | OB+GC | 123 <sup>a</sup>       | 115 <sup>a</sup>        | 124 <sup>a</sup>       | 194 <sup>a</sup>       | 139 <sup>a</sup> |
|                                                                                   | GC    | 121 <sup>a</sup>       | 86 <sup>a</sup>         | 129 <sup>a</sup>       | 223 <sup>b</sup>       | 140 <sup>a</sup> |
|                                                                                   | OB    | 136 <sup>b</sup>       | 202 <sup>b</sup>        | 133 <sup>a</sup>       | 203 <sup>b</sup>       | 168 <sup>a</sup> |

Different letters indicate significant differences between treatments in the same sampling ( $p < 0.05$ )
